# Supplementary material for: An indolium ion-based colorimetric sensor for naked-eye detection of cyanide and ammonia: on-site detection technique for cyanide in natural sources and day-to-day monitoring of food spoilage
Source: Royal Society of Chemistry journal article supplement (doi:10.1039/d4ay01516a), 2024-01-01
Supplement: d4ay01516a1.pdf [file d4ay01516a1.pdf]

## Supporting information

### Contents.

1. HR-MS spectra of the probe, fig. S1, page S1.
2.  $^1\text{H}$ -NMR spectra of the probe in DMSO- $d_6$ , fig. S2 and S3, page S1.
3.  $^{13}\text{C}$ -NMR spectra of the probe in DMSO- $d_6$ , fig. S3, page S2.
4. Absorption spectra of the probe with different anions in DMSO- $d_6$ , fig. S4, page S2.
5. Interference study of the probe for cyanide sensing in presence of other anions, fig. S5, page S3.
6. Absorbance spectra of the probe with  $\text{CN}^-$  in 100% aqueous solution, fig. S6, page S3.
7. Absorbance spectra of the probe with  $\text{CN}^-$  in (8:2)  $\text{H}_2\text{O}$ :DMSO, fig. S7, page S3.
8. Detection limit and binding constant plot of the probe with  $\text{CN}^-$  in (8:2)  $\text{H}_2\text{O}$ :DMSO, fig. S8 (a and b respectively), page S4.
9. Absorbance spectra of the probe with  $\text{NH}_3$  in (8:2)  $\text{H}_2\text{O}$ :DMSO, fig. S9, page S4.
10.  $^1\text{H}$ -NMR spectral changes of the probe in presence of  $\text{NH}_3$  in DMSO- $d_6$ , fig. S10, page S4.
11. HR-MS spectra of the probe after addition of  $\text{CN}^-$ , fig. S11, page S5.
12. HR-MS spectra of the probe after addition of  $\text{NH}_3$ , fig. S12, page S5.
13. Solid state absorption spectra of the Probe@starch-PVA matrix with  $\text{CN}^-$  Solution, fig. S13, page S6.

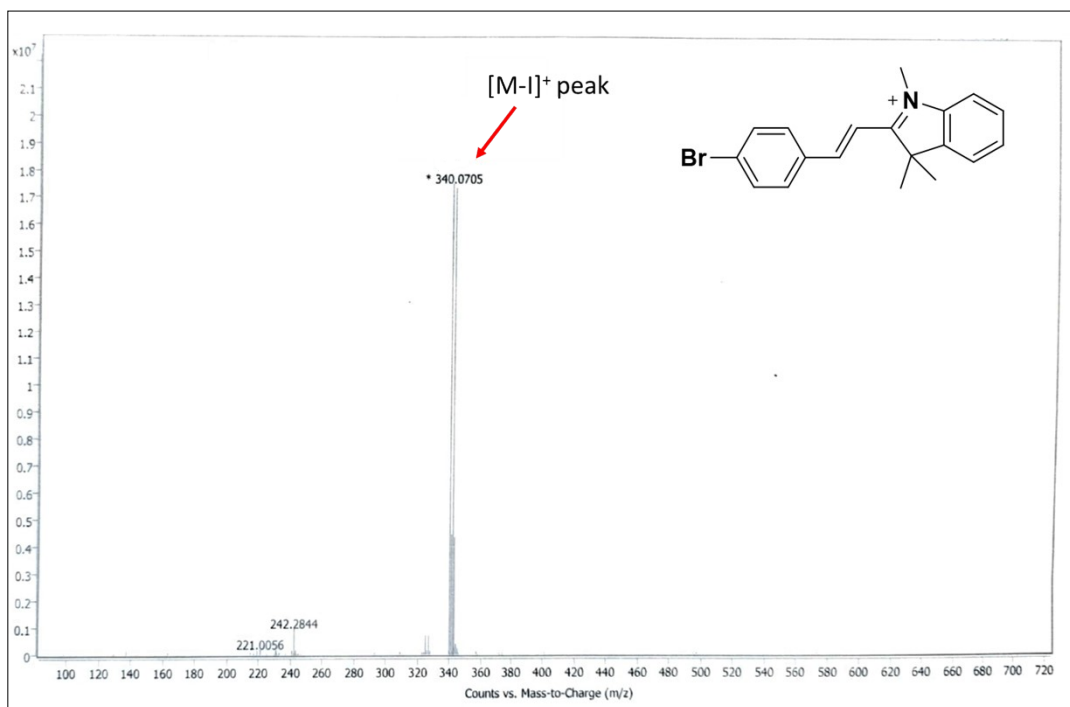

Figure S1: HR-MS spectra of probe 1.

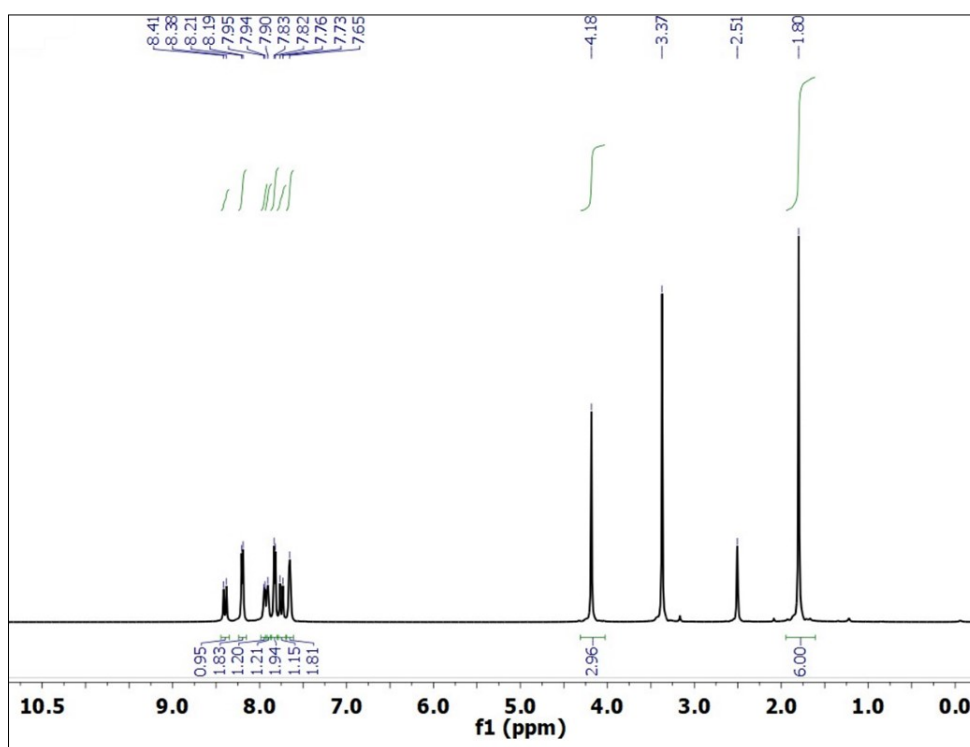

Figure S2: <sup>1</sup>H-NMR spectra of probe 1.

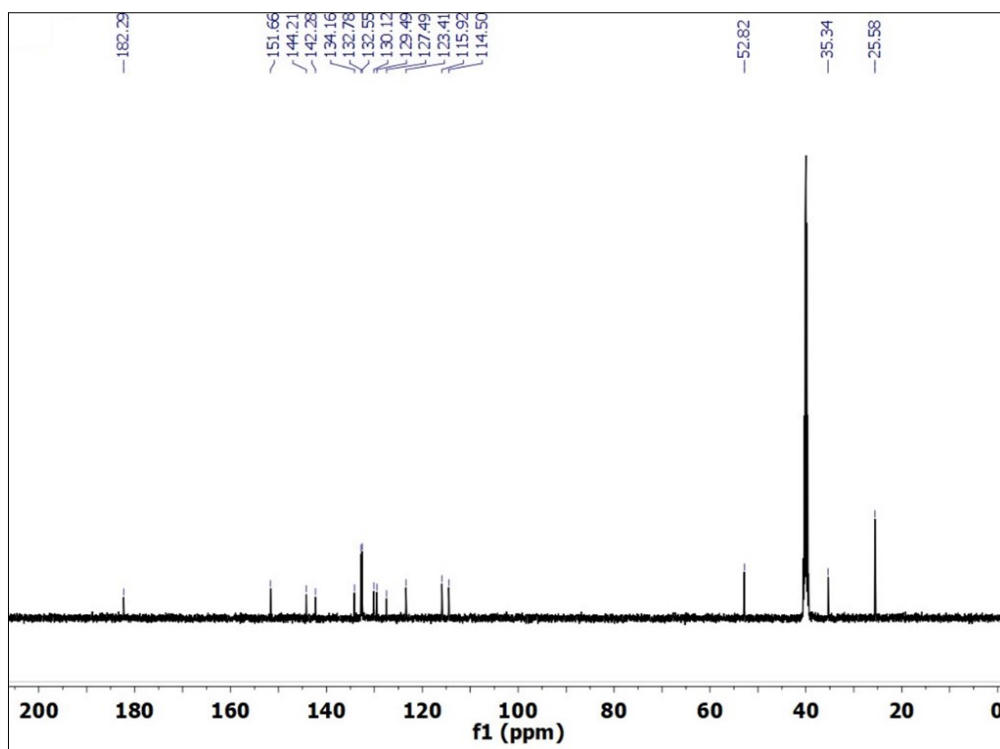

**Figure S3:**  $^{13}\text{C}$  NMR spectra of probe 1.

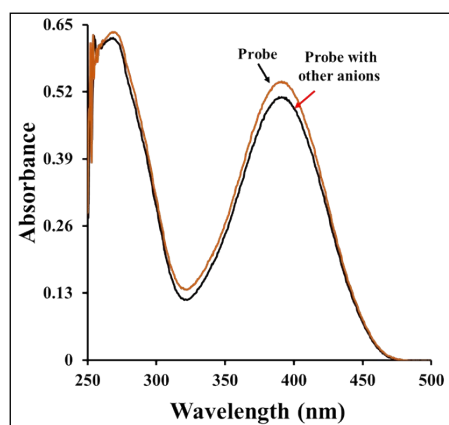

**Figure S4:** Absorbance spectra of the probe with other anions in DMSO.

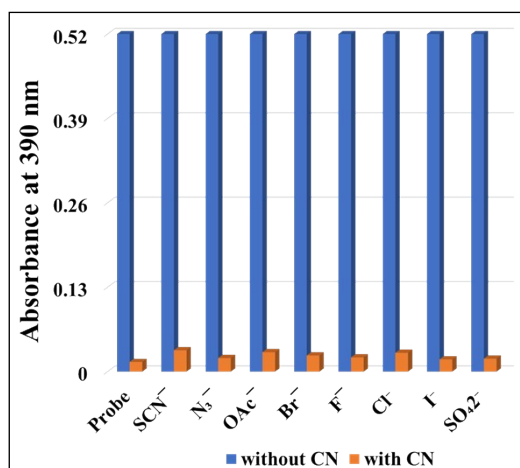

**Figure S5:** Interference study of probe **1** for  $\text{CN}^-$  ion in presence of other anions.

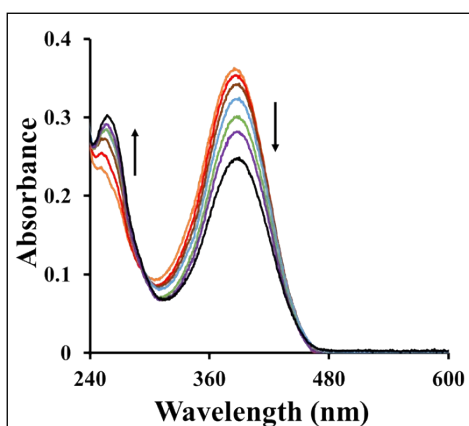

**Figure S6:** Absorbance spectra of probe **1** ( $10^{-5}$  M) with  $\text{CN}^-$  ( $10^{-4}$  M) in 100% aqueous solution.

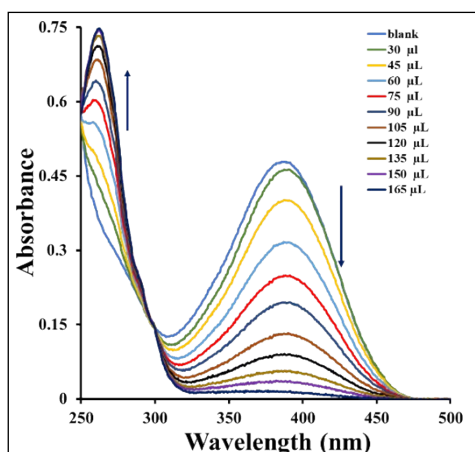

**Figure S7:** Overlaid absorption spectra of Probe **1** ( $10^{-5}$  M) with  $\text{CN}^-$  ( $10^{-4}$  M) in (8:2)  $\text{H}_2\text{O}$ :DMSO solvent.

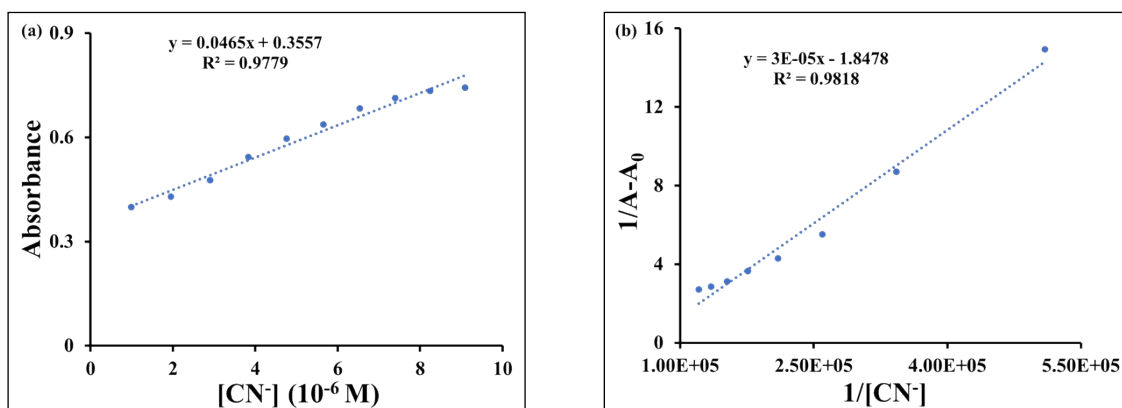

**Figure S8:** (a) Detection limit and (b) binding constant plot of the probe with  $CN^-$  in (8:2)  $H_2O:DMSO$  solvent.

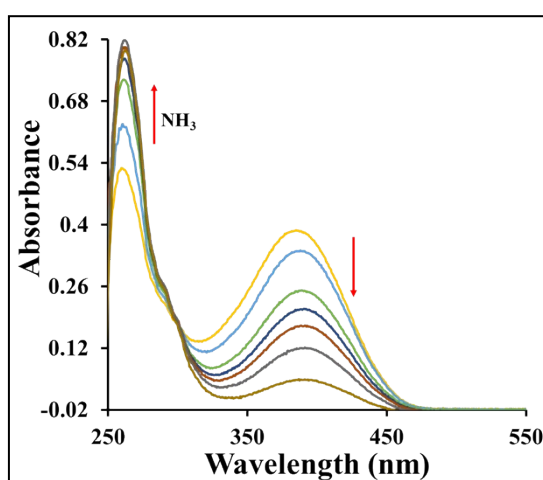

**Figure S9:** Overlaid absorption spectra of Probe 1 ( $10^{-5}$  M) with  $NH_3$  ( $10^{-4}$  M) in (8:2)  $H_2O:DMSO$  solvent.

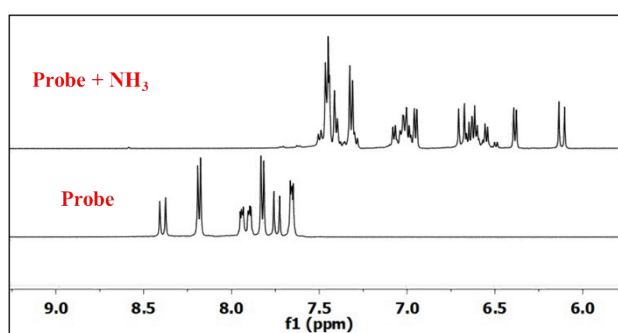

**Figure S10:**  $^1H$ -NMR spectral changes of the probe in presence of ammonia in  $DMSO-d_6$ .

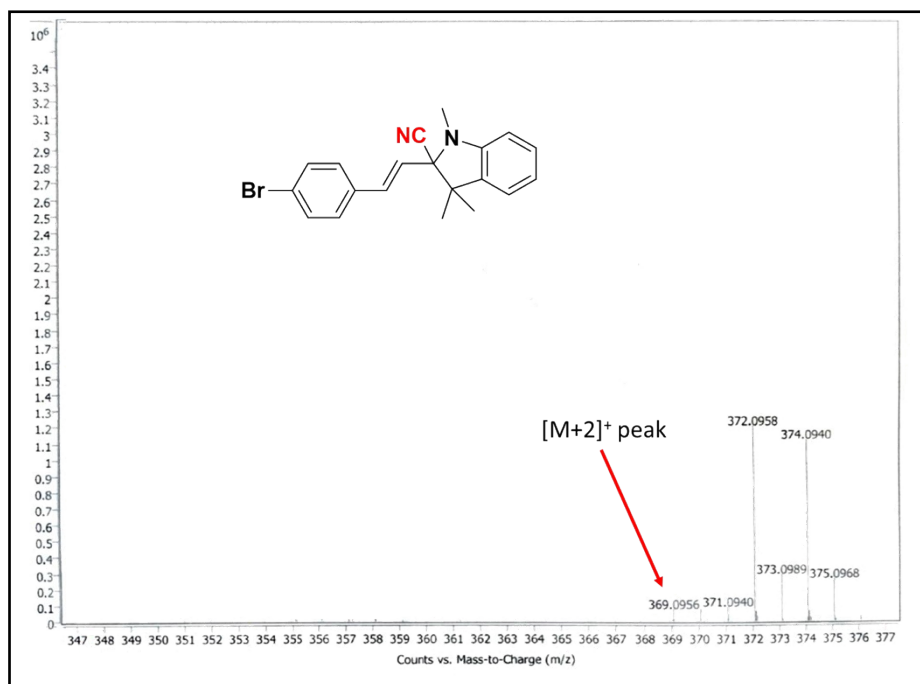

**Figure S11:** HR-MS spectra of the probe after addition of  $\text{CN}^-$ .

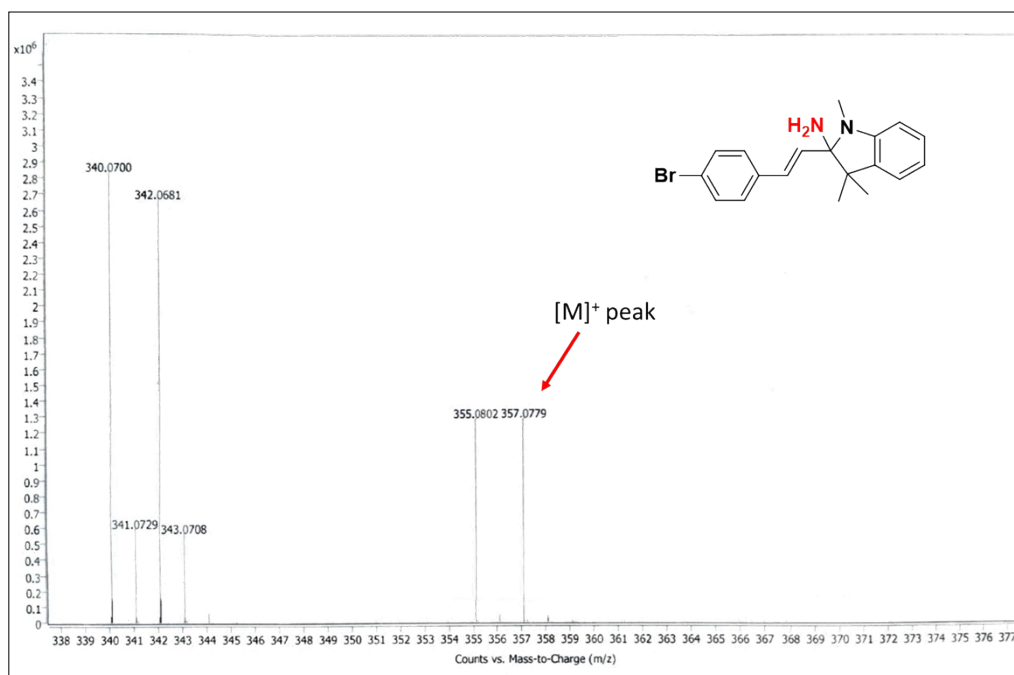

**Figure S12:** HR-MS spectra of the probe after addition of  $\text{NH}_3$ .

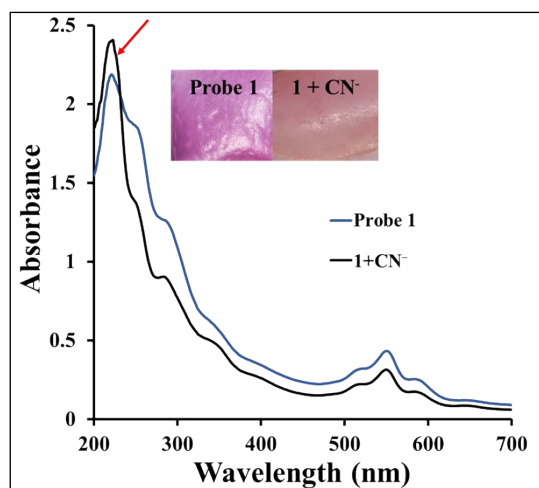

**Figure S13:** Solid state absorption spectra of the Probe@starch-PVA matrix before and after treatment with CN<sup>-</sup> Solution.
